# Supplementary material for: Maleimide: a potential building block for the design of proton exchange membranes studied by ab initio molecular dynamics simulations
Source: Royal Society of Chemistry journal article supplement (doi:10.1039/c5ra14272e), 2015-01-01
Supplement: c5ra14272e1.pdf [file c5ra14272e1.pdf]

**Maleimide: A Potential Building Block for the Design of Proton Exchange Membranes**  
**Studied by Ab Initio Molecular Dynamics Simulations**

Xuejiao Li, Liuming Yan\*, Baohua Yue

Department of Chemistry, College of Sciences, Shanghai University, 99 Shangda Road,  
Shanghai 20044, China

**Supplementary Information**

**Table S1** Atomic coordinates of the initial configuration (unit: Å)

| Atoms | X      | Y      | Z      |
|-------|--------|--------|--------|
| H1    | 4.489  | 7.030  | 8.818  |
| H2    | 6.863  | 4.386  | 10.334 |
| H3    | -0.457 | 7.735  | 5.172  |
| H4    | 2.910  | 11.372 | 12.668 |
| H5    | 3.495  | 0.748  | 2.838  |
| H6    | -0.070 | 5.174  | 9.987  |
| H7    | 6.476  | 6.947  | 5.519  |
| H8    | 3.236  | 3.427  | 10.528 |
| H9    | 3.168  | 8.694  | 4.978  |
| H10   | 5.200  | 2.533  | 13.488 |
| H11   | 1.205  | 9.587  | 2.018  |
| H12   | 4.441  | 10.560 | 9.039  |
| H13   | 1.964  | 1.561  | 6.467  |

\* Corresponding author. Tel.: 8621-66132405, fax: 8621-66132405. E-mail: [liuming.yan@shu.edu.cn](mailto:liuming.yan@shu.edu.cn)

|     |        |        |        |
|-----|--------|--------|--------|
| H14 | 1.966  | 7.000  | 7.023  |
| H15 | 4.439  | 5.121  | 8.484  |
| H16 | 1.276  | 4.334  | 13.939 |
| H17 | 5.129  | 7.786  | 1.567  |
| H18 | 5.865  | 0.825  | 11.940 |
| H19 | 0.084  | 1.057  | 0.140  |
| H20 | 3.784  | 8.458  | 10.065 |
| H21 | 2.621  | 3.663  | 5.441  |
| H22 | 1.198  | 8.712  | 8.550  |
| H23 | 5.207  | 3.409  | 6.956  |
| H24 | 1.983  | 6.409  | 12.915 |
| H25 | 4.421  | 5.712  | 2.591  |
| N26 | 6.565  | 3.762  | 10.878 |
| N27 | -0.159 | 8.358  | 4.628  |
| N28 | 3.174  | 10.947 | 11.944 |
| N29 | 3.231  | 1.173  | 3.562  |
| N30 | 0.328  | 5.782  | 9.493  |
| N31 | 6.077  | 6.338  | 6.013  |
| N32 | 2.876  | 3.868  | 11.199 |
| N33 | 3.528  | 8.253  | 4.307  |
| O34 | 5.768  | 5.107  | 12.573 |
| O35 | 0.637  | 7.014  | 2.933  |
| O36 | 3.859  | 12.755 | 10.708 |

|     |        |        |        |
|-----|--------|--------|--------|
| O37 | 2.546  | -0.633 | 4.799  |
| O38 | 1.183  | 4.414  | 7.837  |
| O39 | 5.222  | 7.707  | 7.670  |
| O40 | 2.062  | 2.089  | 12.439 |
| O41 | 4.343  | 10.031 | 3.067  |
| O42 | 7.134  | 1.899  | 9.669  |
| O43 | -0.728 | 10.221 | 5.837  |
| O44 | 2.645  | 8.806  | 12.565 |
| O45 | 3.760  | 3.314  | 2.941  |
| O46 | -0.130 | 7.634  | 10.780 |
| O47 | 6.536  | 4.486  | 4.726  |
| O48 | 3.389  | 6.014  | 10.540 |
| O49 | 3.016  | 6.106  | 4.966  |
| C50 | 5.954  | 3.983  | 12.097 |
| C51 | 0.450  | 8.137  | 3.409  |
| C52 | 3.705  | 11.553 | 10.857 |
| C53 | 2.700  | 0.567  | 4.649  |
| C54 | 1.015  | 5.529  | 8.335  |
| C55 | 5.390  | 6.591  | 7.171  |
| C56 | 2.226  | 3.283  | 12.288 |
| C57 | 4.179  | 8.837  | 3.218  |
| C58 | 5.621  | 2.684  | 12.650 |
| C59 | 0.784  | 9.437  | 2.856  |

|     |        |        |        |
|-----|--------|--------|--------|
| C60 | 4.042  | 10.456 | 9.896  |
| C61 | 2.363  | 1.665  | 5.610  |
| C62 | 1.468  | 6.853  | 7.818  |
| C63 | 4.936  | 5.268  | 7.688  |
| C64 | 1.766  | 4.411  | 13.128 |
| C65 | 4.639  | 7.710  | 2.378  |
| C66 | 5.991  | 1.758  | 11.815 |
| C67 | 0.414  | 10.363 | 3.691  |
| C68 | 3.681  | 9.316  | 10.458 |
| C69 | 2.724  | 2.804  | 5.048  |
| C70 | 1.059  | 7.778  | 8.654  |
| C71 | 5.346  | 4.343  | 6.852  |
| C72 | 2.152  | 5.543  | 12.565 |
| C73 | 4.253  | 6.578  | 2.941  |
| C74 | 6.632  | 2.376  | 10.649 |
| C75 | -0.226 | 9.745  | 4.857  |
| C76 | 3.101  | 9.569  | 11.772 |
| C77 | 3.304  | 2.552  | 3.734  |
| C78 | 0.355  | 7.146  | 9.772  |
| C79 | 6.050  | 4.974  | 5.734  |
| C80 | 2.869  | 5.268  | 11.336 |
| C81 | 3.536  | 6.852  | 4.170  |

---

**Table S2** Energetic fluctuations during the CPMD simulation in NVT ensemble at five different temperatures (the corresponding standard deviations are shown in brackets)

| Parameters  | Run1                                      | Run2                                      | Run3                                     | Run4                                      | Run5                                      |
|-------------|-------------------------------------------|-------------------------------------------|------------------------------------------|-------------------------------------------|-------------------------------------------|
| $T$         | 362.57<br>(31.49)                         | 412.56<br>(35.20)                         | 462.90<br>(39.42)                        | 511.10<br>(43.56)                         | 564.14<br>(46.82)                         |
| $K_{el}$    | 0.02002<br>(9.3556x10 <sup>-4</sup> )     | 0.02004<br>(0.00102)                      | 0.03002<br>(0.00124)                     | 0.03022<br>(0.00135)                      | 0.03502<br>(0.00143)                      |
| $K_{ion}$   | 0.12598<br>(0.01315)                      | 0.07021<br>(0.01475)                      | 0.29256<br>(0.01659)                     | 0.14129<br>(0.01957)                      | 0.24299<br>(0.01846)                      |
| $E_{KS}$    | -531.42719<br>(0.01343)                   | -531.40622<br>(0.01495)                   | -531.38305<br>(0.01695)                  | -531.35673<br>(0.01980)                   | -531.36429<br>(0.01898)                   |
| $E_{class}$ | -531.30121<br>(0.00126)                   | -531.33601<br>(0.00108)                   | -531.09049<br>(0.00138)                  | -531.21543<br>(0.00159)                   | -531.12131<br>(0.00164)                   |
| $E_{tot}$   | -531.28119<br>(8.47479x10 <sup>-4</sup> ) | -531.31597<br>(3.89866x10 <sup>-4</sup> ) | -531.06047<br>(6.4857x10 <sup>-4</sup> ) | -531.18541<br>(8.21703x10 <sup>-4</sup> ) | -531.08629<br>(8.5771 x10 <sup>-4</sup> ) |
